# Supplementary material for: Active Archaeal Communities at Cold Seep Sediments Populated by Siboglinidae Tubeworms from the Storegga Slide
Source: Springer Nature journal article supplement (doi:10.1007/s00248-010-9654-1), 2010-04-16
Supplement: MOESM1 [file 248_2010_9654_MOESM1_ESM.doc]

Supplementary material

**SM1.**
